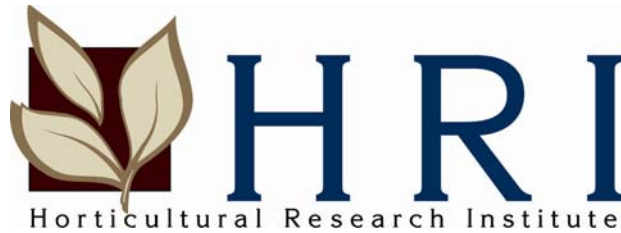

This Journal of Environmental Horticulture article is reproduced with the consent of the Horticultural Research Institute (HRI – [www.hriresearch.org](http://www.hriresearch.org)), which was established in 1962 as the research and development affiliate of the American Nursery & Landscape Association (ANLA – <http://www.anla.org>).

HRI's Mission:

To direct, fund, promote and communicate horticultural research, which increases the quality and value of ornamental plants, improves the productivity and profitability of the nursery and landscape industry, and protects and enhances the environment.

The use of any trade name in this article does not imply an endorsement of the equipment, product or process named, nor any criticism of any similar products that are not mentioned.

---

## Research Reports

---

# Sales, Value Added and Employment Impacts of the United States Sod Production Industry<sup>1</sup>

John J. Haydu<sup>2</sup>, Alan W. Hodges<sup>3</sup>, Charles R. Hall<sup>4</sup> and John L. Cisar<sup>5</sup>

Food and Resource Economics Department, University of Florida  
Mid-Florida Research and Education Center, 2725 S. Binion Road, Apopka, FL 32703-8504

### Abstract

A study using government secondary data in conjunction with primary data collected through a national survey was conducted to assess the importance of the sod production industry to the United States economy. Results indicate that the 2,124 sod farms contributed over \$1.72B in gross output or sales impacts to the U.S. economy, \$1.31B in value added, employed 13,454 people, and paid \$28.6M in indirect business taxes. The top five producing states in terms of sales impacts include Florida (\$344M), Texas (\$183M), Alabama (\$118M), Georgia (\$116M) and Oklahoma (\$84M), accounting for nearly 50% of total sales.

**Index words:** economic impact, employment, multipliers, sod production, value added.

### Significance to the Nursery Industry

In recent years, residential and commercial business construction has been strong in the United States, fueled by low interest rates and wealth accumulation from rising home values. As a consequence, the nursery industry has been equally dynamic as it strives to satisfy the demand for landscape plant materials. The sod production sector is little known, but a critical component of the U.S. nursery and greenhouse industry that supplies much of the grass that is used for lawns, especially in the southern states. The United States Depart-

ment of Agriculture (USDA) has collected limited information on the number of sod farms, number of acres produced, and number of acres harvested, but reports of these numbers are published infrequently and lack the comprehensiveness given to reports of traditional agricultural sectors. In response, some states have conducted their own studies verifying that this industry is not only growing but, in some cases, evolving into a highly significant commodity area. However, there is still nothing available that offers this information on a consistent basis for all 50 states. This research sought to address this problem by conducting a systematic and comprehensive economic impact study of the U.S. sod production industry. The approach relied primarily on existing secondary data, but it was supplemented with primary information so that state and national economic impact analyses could be conducted. For the first time, this project has documented the importance of the sod production industry at the national level in terms of total sales impacts, value added, jobs generated and indirect business taxes paid. The top ten states for total sales impacts, value added and number of jobs are presented.

<sup>1</sup>Received for publication October 25, 2006; in revised form December 22, 2006.

<sup>2</sup>Professor.

<sup>3</sup>Associate in the Food & Resource Economics Department, University of Florida, Gainesville, FL.

<sup>4</sup>Professor, Department of Agricultural Economics, University of Tennessee, Knoxville, TN.

<sup>5</sup>Professor in the Environmental Horticulture Department, University of Florida, Ft. Lauderdale Research & Education Center, Ft. Lauderdale, FL.

---

---

Copyright 2007

Horticultural Research Institute  
1000 Vermont Avenue, NW, Suite 300  
Washington, DC 20005

Reprints and quotations of portions of this publication are permitted on condition that full credit be given to both the HRI *Journal* and the author(s), and that the date of publication be stated. The Horticultural Research Institute is not responsible for statements and opinions printed in the *Journal of Environmental Horticulture*; they represent the views of the authors or persons to whom they are credited and are not binding on the Institute as a whole.

Where trade names, proprietary products, or specific equipment is mentioned, no discrimination is intended, nor is any endorsement, guarantee or warranty implied by the researcher(s) or their respective employer or the Horticultural Research Institute.

The *Journal of Environmental Horticulture* (ISSN 0738-2898) is published quarterly in March, June, September, and December by the Horticultural Research Institute, 1000 Vermont Avenue, NW, Suite 300, Washington, DC 20005. Subscription rate is \$65.00 per year for scientists, educators and ANLA members; \$95.00 per year for libraries and all others; add \$25.00 for international (including Canada and Mexico) orders. Periodical postage paid at Washington, DC, and at additional mailing offices. POSTMASTER: Send address changes to *Journal of Environmental Horticulture*, 1000 Vermont Avenue, NW, Suite 300, Washington, DC 20005.

## Introduction

For many decades the U.S. Department of Agriculture has collected detailed production and financial data on the farm sector. This information has been used by government agencies, universities, and trade associations to track changes in the size and scope of the various agricultural industries over time. Early on, however, not all sectors of agriculture were included in the government's data collection effort. Typically, those sectors for which data were provided were limited to large-scale 'food & fiber' commodities, such as corn, soybeans, cotton, citrus, dairy, and cattle. This decision to focus on the largest, most common sectors of agriculture was largely cost driven — it was simply too expensive for the government to collect detailed information on the many hundreds of relatively minor 'specialty crops' that were produced. In the past 15–20 years, the economic significance of specialty crops has grown appreciably and the USDA now conducts broader studies that include nearly every specialty crop. Additional studies have been conducted that focus on ornamental crops and turfgrass, such as 'Floriculture and Nursery Crops Outlook' (16). While these studies have filled a void in government statistics for 'green industry' crops, due to the large numbers of specialty crops and the number of states producing them, information collected is largely limited to area under production and, in some cases, area harvested and sales.

Increasingly, state associations representing specialty crops require more detailed information that documents the economic significance of their industry. Incentives to acquire this information focus more and more on regulatory and resource allocation issues, government financial support, and legislative actions that limit chemicals and fertilizers used in the production process. Competition for these natural and economic resources is felt in many parts of the country, but it is particularly acute in densely populated areas (3, 4, 9). As industries struggle for access to more water and land, the need for documentation of their economic contributions to society have become more essential and, as a result, a recent abundance of 'green industry' studies funded largely by state trade associations and conducted by University economists and horticulturists have been published. The scope of industry publications and the methodologies employed vary widely, but all have a common theme and purpose of documenting the economic contribution of their respective industries. A list of over 50 of these state-level publications spanning the period 1978 to 2004 were compiled for this study. The titles of these studies can be grouped into three categories: 1) those with general titles such as 'Green Industry Survey', 'Environmental Horticulture' or 'Nursery Industry', most of which also cover the turfgrass industry; 2) studies with titles that identify both nursery and turfgrass explicitly; and 3) studies with turfgrass titles only.

Cultivated turfgrass is a pervasive feature of the urban landscape in the United States and many other developed regions of the world. According to Beard (1), turfgrass provides at least three major benefits to human activities — a) functional, b) recreational, and c) ornamental. *Functional* uses include erosion control from wind and water, thus effectively reducing dust and mud levels for homes and businesses. Turf is also helpful at reducing glare, noise and heat surrounding homes or commercial buildings. *Recreational* use of turf is extensive throughout the world. Common sports activities played on turf include golf, lawn tennis, soccer, rugby, polo, football and baseball. Most professional and recreational

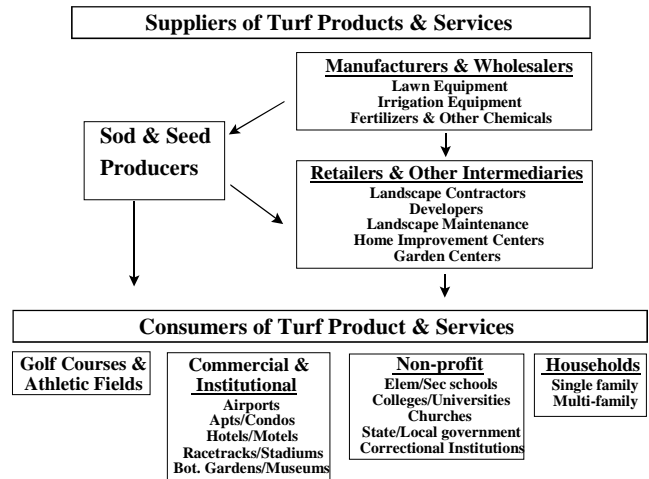

Fig. 1. Economic structure of the United States turfgrass industry.

sports utilize grass because of its ability to minimize injuries (compared to hard surfaces) and provide a durable groundcover capable of cost-effective regeneration from season to season. *Ornamental* or aesthetic attributes of turfgrass are also highly regarded. Metropolitan areas and suburban residences profit from the agreeable surroundings of healthy lawns, especially if complemented with trees, flowers and shrubs. Properly landscaped homes and businesses may also benefit financially from higher resale values when compared to poorly landscaped residences (2, 5, 10, 13).

The structure of the turfgrass industry and the flow of goods and services among the various sectors of the industry are shown in Fig. 1. Central to this economic activity are the sod producers who create the product that is directly or indirectly utilized by the rest of the turfgrass industry. As the figure shows, harvested sod is ultimately sold to four major user groups — golf courses and athletic fields, commercial and institutional markets, non-profit organizations such as schools and churches, and households. Market intermediaries purchase the sod and then provide value added services to customers including transportation, packaging, installation, and product use information. Finally, lawn maintenance service vendors provide complete lawn care services, such as mowing, irrigation, fertilization, and control of pests and diseases. Each of these service activities adds value to turfgrass products for final consumers.

An initial objective of this study was to combine secondary data from the USDA with individual state-sponsored projects to derive a national economic profile of the sod production industry. However, only a small number of states actually conducted studies on the sod production industry, resulting in checkerboard coverage of the industry nationally. In addition, the time frame when these studies were conducted spans a decade or more, making much of the information out-dated. The technical issue was that data derived from disparate sources is often non-compatible due to differing research objectives, methodologies and variables employed in the investigative process. Non-compatibility prevents assimilation of data into a useful and seamless report.

The ultimate objective of this study was to develop an economic impact assessment of the U.S. sod production industry. Eventually this objective expanded to cover the five major sectors that comprise the U.S. turfgrass industry, one of which

is the sod production sector. In this article, results are confined to the sod production sector, as this was the original project objective and it is easily defined and circumscribed. For the study, an input-output (I-O) model was employed to generate multipliers that account for the full range of economic activity between industry sectors within a given state. The I-O model captures what each business or sector must purchase from every other business or sector to produce its products and services. Variables examined in this analysis include output (total sales impacts), employment, value added, labor income, and indirect business taxes.

## Materials and Methods

**Information sources.** Economic information on the sod industry was compiled from national and state data on number of farms and production area from the Census of Agriculture for 2002 (15). Area and value of turfgrass harvested were estimated from a survey conducted by the University of Florida, with harvest value based on regional average prices (14). This was necessary because Census data estimated production area but not quantities of turfgrass harvested and sold. In this survey, a total of 581 sod farms were sent questionnaires of which 159 were returned, for a response rate of 27% (Table 1). Responses were obtained from the following 37 states by region: *Northeast* (Maine, New Hampshire, New York, Rhode Island); *East Central* (Delaware, Kentucky, Maryland, Michigan, New Jersey, Ohio, Pennsylvania, Virginia); *Southeast* (Alabama, Florida, Georgia, North Carolina, South Carolina, Tennessee); *North Central* (Illinois, Iowa, Minnesota, Nebraska, Wisconsin); *South Central* (Arkansas, Kansas, Missouri, Texas, Oklahoma); *Western Interior* (Colorado, Idaho, Montana, Nevada, Utah, Wyoming); and *Western Coastal* (California, Oregon, Washington). States were grouped into these regions for two principal reasons: 1) they were used in earlier studies (6, 7, 8), which facilitates comparison of results across studies and 2) some states had relatively few returns so grouping them into areas with geographic similarities provided more accurate estimates of the variables being examined.

To determine sales value, respondents were asked their production area, percent harvested, and average weighted price (farm gate price, i.e., delivery not included). Respondents were also asked to indicate the share of sales that were sold outside their respective states. Shares of sales exported out of state were used to generate multipliers for the input-output analysis.

**Economic impact analysis.** To evaluate the broad regional economic impacts of the sod production industry in the United States, regional economic models were developed for each state using the *Implan* software system and associated state datasets (11). The information for these models was derived from the U.S. National Income and Product Accounts, together with regional economic data collected by the U.S. Department of Commerce, Bureau of Economic Analysis. Input-output models represent the structure of a regional economy in terms of transactions between industries, employees, households, and government institutions (12).

Economic multipliers derived from the models were used to estimate the total economic activity generated in each state. In addition to direct sales by industry firms, total economic activity includes the effects of intermediate purchases by industry firms from other economic sectors (indirect effects) and the effects of industry employee household consumer spending (induced effects). The regional *Implan* models were constructed as fully closed models, with all household, government, and capital accounts treated as endogenous, to derive Social Accounting Matrix (SAM) type multipliers, which represent transfer payments as well as earned income. Separate multipliers are provided for output, employment, value added, labor income, and business taxes. These multipliers were applied to estimated industry sales to derive estimates of total economic impacts. For the sod production sector, total economic impacts were estimated as:

$$I_{hj} = S_h \times [A_{hj} + E_h \times (B_{hj} + C_{hj})]$$

where:

$I_{hj}$  is total impact for measures (j) of output, employment, value added, labor income, or indirect business taxes, in each state (h).

$S_h$  is industry sales in state h.

$A_{hj}$  is the direct effects multiplier for measure j in state h.

$E_h$  is the proportion of industry sales exported or shipped outside the state, by state h.

$B_{hj}$  is the indirect effects multiplier for measure j in state h.

$C_{hj}$  is the induced effects multiplier for measure j in state h.

The calculation assumes that only the export portion of output is sold to final demand and, therefore, is subject to the indirect and induced effects multipliers, while the remainder of in-state sales is subject to intermediate demand from other business sectors and to direct effects multipliers. Data on exports were estimated from regional averages of the survey

**Table 1. Production and marketing characteristics of U.S. sod producers surveyed, by region.**

|                                                                     | Northeast         | East Central | Southeast | North Central | South Central | Western Interior | Western Coastal | Total   |
|---------------------------------------------------------------------|-------------------|--------------|-----------|---------------|---------------|------------------|-----------------|---------|
| Number firms contacted                                              | 21                | 99           | 206       | 78            | 63            | 65               | 49              | 581     |
| Number firms responding                                             | 10                | 25           | 72        | 18            | 12            | 12               | 10              | 159     |
| Production area (acres)                                             | 4,527             | 12,151       | 72,056    | 11,920        | 10,746        | 4,725            | 8,235           | 124,360 |
| Share of production area harvested                                  | 0.537             | 0.354        | 0.599     | 0.479         | 0.667         | 0.465            | 0.970           | 0.587   |
| Number employees per acre production area (full-time and part-time) | 0.031             | 0.029        | 0.024     | 0.025         | 0.034         | 0.040            | 0.097           | 0.031   |
| Average sod price (\$/ft <sup>2</sup> )                             | 0.229             | 0.168        | 0.147     | 0.165         | 0.146         | 0.220            | 0.235           | 0.165   |
|                                                                     | (7%) <sup>z</sup> | (8%)         | (11%)     | (26%)         | (13%)         | (7%)             | (8%)            | (6%)    |
| Share of non-local sales (outside state)                            | 0.356             | 0.062        | 0.053     | 0.210         | 0.087         | 0.120            | 0.007           | 0.080   |
|                                                                     | (22%)             | (38%)        | (32%)     | (53%)         | (59%)         | (46%)            | (95%)           | (17%)   |

<sup>z</sup>Numbers in parentheses indicate relative standard errors of mean values.

Source: UF/IFAS Sod Producer Survey, 2005 (unpublished data).

**Table 2. Summary of economic impacts of the sod production industry, by state, 2002.**

| State          | Farms <sup>z</sup> | Production area (acres) <sup>z</sup> | Harvest value (\$1000) | Output impacts (\$1000) | Employment (jobs) <sup>y</sup> | Employment impacts (jobs) <sup>y</sup> | Value added impacts (\$1000) | Labor income impacts (\$1000) | Indirect business tax impacts (\$1000) |
|----------------|--------------------|--------------------------------------|------------------------|-------------------------|--------------------------------|----------------------------------------|------------------------------|-------------------------------|----------------------------------------|
| Alabama        | 96                 | 25,805                               | 109,152                | 118,473                 | 879                            | 999                                    | 112,541                      | 38,031                        | 2,567                                  |
| Alaska         | 2                  | 130                                  | 550                    | 593                     | 4                              | 5                                      | 324                          | 160                           | 7                                      |
| Arizona        | 13                 | 3,187                                | 14,173                 | 16,239                  | 126                            | 151                                    | 13,402                       | 7,237                         | 270                                    |
| Arkansas       | 58                 | 8,998                                | 38,060                 | 41,130                  | 306                            | 349                                    | 35,997                       | 15,602                        | 729                                    |
| California     | 62                 | 15,909                               | 67,293                 | 76,006                  | 542                            | 629                                    | 53,264                       | 29,126                        | 1,085                                  |
| Colorado       | 48                 | 7,767                                | 34,540                 | 40,496                  | 307                            | 372                                    | 24,688                       | 14,600                        | 568                                    |
| Connecticut    | 10                 | 1,251                                | 4,317                  | 5,232                   | 32                             | 41                                     | 4,809                        | 2,473                         | 108                                    |
| Delaware       | 6                  | 2,305                                | 5,982                  | 6,304                   | 68                             | 71                                     | 6,044                        | 2,062                         | 129                                    |
| Florida        | 235                | 92,990                               | 306,800                | 343,562                 | 3,167                          | 3,604                                  | 309,005                      | 140,715                       | 6,571                                  |
| Georgia        | 92                 | 24,653                               | 104,279                | 115,748                 | 840                            | 969                                    | 109,263                      | 38,867                        | 2,570                                  |
| Hawaii         | 20                 | 113                                  | 478                    | 532                     | 4                              | 5                                      | 479                          | 306                           | 7                                      |
| Idaho          | 38                 | 4,704                                | 20,919                 | 23,564                  | 186                            | 224                                    | 22,111                       | 13,261                        | 371                                    |
| Illinois       | 40                 | 7,994                                | 27,585                 | 35,604                  | 203                            | 281                                    | 21,999                       | 11,694                        | 656                                    |
| Indiana        | 38                 | 5,076                                | 17,516                 | 21,526                  | 129                            | 175                                    | 12,193                       | 6,541                         | 340                                    |
| Iowa           | 33                 | 4,836                                | 16,688                 | 20,026                  | 123                            | 165                                    | 9,787                        | 5,071                         | 287                                    |
| Kansas         | 49                 | 4,971                                | 21,027                 | 23,085                  | 169                            | 193                                    | 10,002                       | 5,935                         | 213                                    |
| Kentucky       | 54                 | 4,692                                | 12,177                 | 12,864                  | 137                            | 146                                    | 11,490                       | 5,365                         | 209                                    |
| Louisiana      | 23                 | 2,747                                | 11,619                 | 12,698                  | 94                             | 108                                    | 8,729                        | 4,676                         | 165                                    |
| Maine          | 10                 | 1,151                                | 3,972                  | 4,813                   | 29                             | 41                                     | 3,619                        | 2,099                         | 80                                     |
| Maryland       | 29                 | 4,987                                | 12,943                 | 14,054                  | 146                            | 159                                    | 12,434                       | 5,570                         | 245                                    |
| Massachusetts  | 6                  | 390                                  | 1,347                  | 1,687                   | 10                             | 13                                     | 1,035                        | 701                           | 25                                     |
| Michigan       | 54                 | 10,262                               | 26,633                 | 28,505                  | 301                            | 321                                    | 14,626                       | 228                           | 228                                    |
| Minnesota      | 89                 | 14,564                               | 50,256                 | 64,126                  | 369                            | 518                                    | 31,543                       | 18,630                        | 1,015                                  |
| Mississippi    | 47                 | 4,352                                | 18,408                 | 19,871                  | 148                            | 169                                    | 18,913                       | 7,737                         | 388                                    |
| Missouri       | 53                 | 6,002                                | 25,388                 | 28,174                  | 204                            | 238                                    | 14,938                       | 8,346                         | 320                                    |
| Montana        | 16                 | 1,232                                | 5,479                  | 6,064                   | 49                             | 57                                     | 3,286                        | 1,957                         | 64                                     |
| Nebraska       | 38                 | 3,015                                | 10,404                 | 12,537                  | 76                             | 104                                    | 5,891                        | 3,388                         | 168                                    |
| Nevada         | 11                 | 720                                  | 3,202                  | 3,647                   | 28                             | 33                                     | 3,415                        | 2,170                         | 56                                     |
| New Hampshire  | 2                  | 130                                  | 449                    | 557                     | 3                              | 5                                      | 340                          | 219                           | 8                                      |
| New Jersey     | 53                 | 12,485                               | 32,402                 | 34,391                  | 366                            | 385                                    | 28,426                       | 14,027                        | 515                                    |
| New Mexico     | 5                  | 1,186                                | 5,274                  | 5,958                   | 47                             | 57                                     | 5,188                        | 2,988                         | 93                                     |
| New York       | 14                 | 6,868                                | 23,699                 | 28,564                  | 174                            | 221                                    | 20,459                       | 11,645                        | 499                                    |
| North Carolina | 87                 | 10,952                               | 46,326                 | 50,760                  | 373                            | 427                                    | 48,039                       | 16,430                        | 1,113                                  |
| North Dakota   | 3                  | 27                                   | 93                     | 108                     | 1                              | 1                                      | 44                           | 25                            | 1                                      |
| Ohio           | 62                 | 9,434                                | 24,484                 | 26,018                  | 276                            | 294                                    | 15,065                       | 7,831                         | 267                                    |
| Oklahoma       | 95                 | 17,846                               | 75,486                 | 83,909                  | 608                            | 721                                    | 46,714                       | 25,848                        | 969                                    |
| Oregon         | 14                 | 2,608                                | 11,032                 | 12,293                  | 89                             | 105                                    | 7,665                        | 5,211                         | 128                                    |
| Pennsylvania   | 24                 | 2,100                                | 5,450                  | 5,884                   | 62                             | 66                                     | 4,358                        | 2,482                         | 75                                     |
| Rhode Island   | 15                 | 2,453                                | 8,465                  | 10,034                  | 62                             | 81                                     | 6,216                        | 3,731                         | 138                                    |
| South Carolina | 27                 | 14,027                               | 59,333                 | 64,450                  | 478                            | 544                                    | 61,244                       | 16,341                        | 1,312                                  |
| South Dakota   | 3                  | 195                                  | 674                    | 796                     | 5                              | 7                                      | 409                          | 212                           | 11                                     |
| Tennessee      | 56                 | 8,419                                | 35,611                 | 39,625                  | 287                            | 337                                    | 21,145                       | 11,561                        | 449                                    |
| Texas          | 205                | 38,341                               | 162,178                | 183,305                 | 1,306                          | 1,530                                  | 108,294                      | 59,123                        | 2,425                                  |
| Utah           | 46                 | 4,036                                | 17,948                 | 21,022                  | 160                            | 200                                    | 17,318                       | 9,976                         | 339                                    |
| Vermont        | 3                  | 3                                    | 10                     | 12                      | 0                              | 0                                      | 9                            | 5                             | 0                                      |
| Virginia       | 25                 | 7,315                                | 18,985                 | 20,404                  | 214                            | 231                                    | 13,936                       | 7,390                         | 252                                    |
| Washington     | 41                 | 3,756                                | 15,887                 | 17,501                  | 128                            | 146                                    | 14,432                       | 8,955                         | 229                                    |
| West Virginia  | 2                  | 130                                  | 338                    | 357                     | 4                              | 4                                      | 90                           | 62                            | 2                                      |
| Wisconsin      | 63                 | 4,399                                | 15,180                 | 18,648                  | 111                            | 153                                    | 10,423                       | 6,465                         | 265                                    |
| Wyoming        | 9                  | 610                                  | 2,713                  | 3,000                   | 24                             | 28                                     | 1,706                        | 1,026                         | 34                                     |
| Total U.S.     | 2,124              | 412,123                              | 1,533,203              | 1,724,755               | 13,454                         | 15,681                                 | 1,307,348                    | 604,105                       | 28,564                                 |

<sup>z</sup>Source: USDA/NASS, Census of Agriculture, 2002.

<sup>y</sup>Employment includes full-time and part-time workers.

data. Total impacts of the sod industry at the national level were estimated by simply summing the impacts for all 50 states.

### Results and Discussion

*National impacts.* According to the 2002 Census of Agriculture, a total of 2,124 sod production firms were in operation in 2002 (15) (Table 2). These firms had 412,123 acres of sod in production in open fields and harvested 244,354 acres,

59% of production area. The sales of sod directly within the respective states (direct impacts) represented almost 90% of sales. Indirect impacts, which are the purchase of goods and services from other sectors used in the production process, accounted for \$28.6M. Induced impacts (effects of money spent from wages and salaries by industry employees) resulted in an additional \$163M. The combined output of direct, indirect and induced impacts was \$1.72B for all sod producers. The indirect and induced impacts above and beyond direct sales were just over 11% for sod production. This

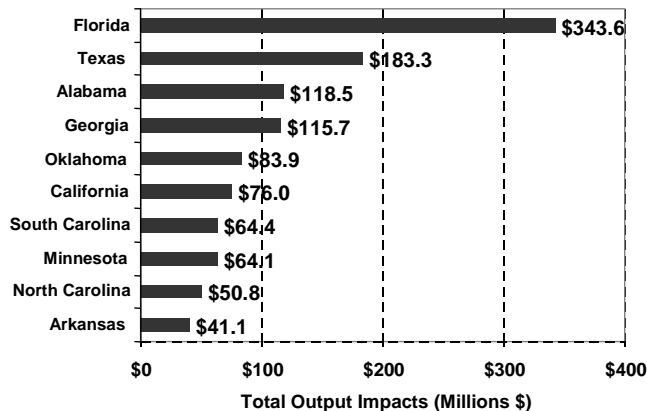

Fig. 2. Top ten states for output impacts in the sod production sector, 2002.

differs from the nearly 30 and 40% for lawn care services and lawn care retailing, respectively. The difference is due primarily to the ‘product’ orientation of sod production rather than the ‘service’ orientation of the lawn care services and retailing sectors, which demand larger labor forces and account for much of the value added.

In addition to total output impacts, an even more important estimate of economic contribution is value added. Value added is an important measure of an industry’s contribution to a regional economy that represents the difference between sales revenues and the cost of purchased inputs. It includes the value of employee wages, salaries and benefits, business owner income (profits, dividends), property income such as interest and rents, business taxes paid to state and local governments, and capital consumption (depreciation). Nationally, the sod production industry generated \$1.31B in value added.

Because of their strong economic and political ramifications, employment figures are perhaps the most visible aspects of a business entity or industry. Jobs and unemployment rates are watched closely as indicators of the economic health of a region. Wages spent on goods and services by

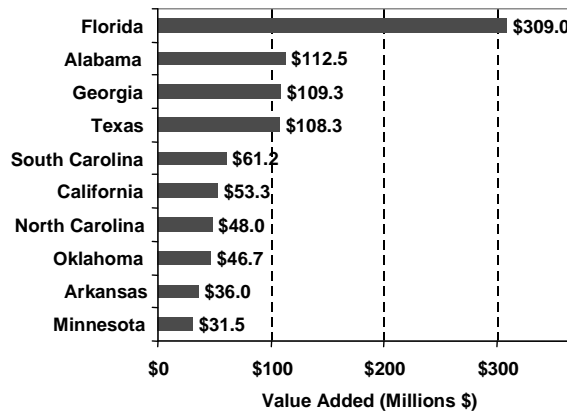

Fig. 4. Top ten states for value added impacts in the sod production sector, 2002.

employees ripple through and stimulate all sectors of the economy. Nationally the sod production industry generated 15,681 jobs and paid out \$604M in labor income. Indirect business taxes paid to local, state and federal governments totaled \$28.6M.

*State and regional impacts.* When ranking the top ten states in terms of total economic impact for sod production, four tiers are readily apparent. Florida clearly held the top tier in output impacts with nearly \$344M, 20%, of the U.S. total (Fig. 2). Texas comprised the second tier with \$183M in output impacts. Together these two states accounted for nearly one-third (30%) of total U.S. output impacts. Alabama at \$118M and Georgia with \$116M in output impacts were third and fourth, and represent the third tier. The fourth tier consisted of Oklahoma (\$84M), California (\$76M), South Carolina and Minnesota (\$64M each), North Carolina (\$51M), and Arkansas (\$41M) with Colorado and Tennessee just out of the top ten with \$40M each. Altogether, the top ten states accounted for \$1.14B or 66% of sod production output impacts generated in the United States.

In terms of the top ten states for employment impacts for sod production, four tiers are again discernable, with Florida holding the number one spot at 3,604 jobs. Texas is ranked second with 1,530 jobs. Alabama and Georgia with 999 and 969 jobs, respectively, form a third tier. Rounding out the top ten states are Oklahoma, California, South Carolina, Minnesota, North Carolina and New Jersey — with employment ranging from a high of 721 in the case of Oklahoma to a low of 385 for New Jersey. Altogether, these states accounted for 66% of total employment by the U.S. sod production sector.

As shown in Fig. 3, the Southeast contributed the largest share of value added at \$661M, just over 50% of the total value added impact by the sod industry. The top ten states for value added accounted for over two-thirds of the \$1.31B in value added for the U.S. sod production industry (Fig. 4). Florida dominated with \$309M, followed by three states — Alabama (\$113M), Georgia (\$109M), and Texas (\$108M). A third tier is comprised of South Carolina, California, North Carolina, Oklahoma, Arkansas and Minnesota. Within this group, value added ranged from a high of \$61M for South Carolina to a low of \$32M for Minnesota.

It is important to recognize that rankings in one category, such as employment or number of firms, do not guarantee a

Regional Value Added Impacts  
(Million \$)

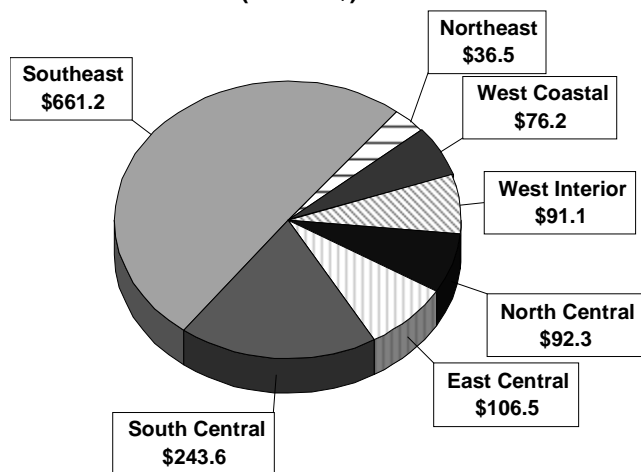

Fig. 3. Regional value added impacts of the U.S. sod production sector, 2002.

similar ranking with other indicators, because of the difference in economic structure among states. For example, with value added, Alabama and Georgia rank above Texas, which was second for both sales and jobs, and New Jersey reached the top ten only with jobs, replacing Arkansas, which was in the top ten for both sales impacts and value added, but ranked twelfth in jobs.

The U.S. sod production industry represents a vital sector within the turfgrass industry and is growing in importance in many states, particularly in southern states where sod is more easily grown. In Florida, sod realized \$307M in farm cash receipts, making it a top ten agricultural commodity for the state. Similar prominent rankings are found in Alabama, Georgia, South Carolina and Texas, as well as Oklahoma and the northern states of Minnesota and Michigan. New residential construction in the United States grew from 1.57 million units in 2000 to 1.93 million units in 2005, representing a 22.7% increase (17). As urban populations continue to grow, the demand for landscape materials and sod will also grow. As it does, the supply of sod will increase in economic importance relative to many other agricultural commodities.

### Literature Cited

1. Beard, James B. 1973. *Turfgrass Science and Culture*, Prentice-Hall, Inc., Englewood Cliffs, NJ.
2. Behe, B., J. Hardy, S. Barton, J. Brooker, T. Fernandez, C. Hall, J. Hicks, R. Hinson, P. Knight, R. McNiel, T. Page, B. Rowe, C. Safley, and R. Schutski. 2005. Landscape plant material, size, and design sophistication increase perceived home value. *J. Environ. Hort.* 23:127–133.
3. Campbell, R. and R. Sargent. 2001. Water Crisis May Strike Here by 2006. *The Orlando Sentinel*. November 27, p. A1.
4. Carriker, R.L. 1993. *Agriculture, Water Quality, and Public Policy*. Univ. of Florida, Inst. of Food & Ag. Sci., Food Res. Econ. Dept., SP-96-15.
5. Des Rosiers, F., M. Theriault, Y. Kestens, and P. Vleeneuve. 2002. Landscaping and house values: An empirical investigation. *J. of Real Estate Res.* 23(1-2):139–161.
6. Haydu, J.J. and A.W. Hodges. 2000. Market Expansion Strategies for Turfgrass Producers in the Eastern United States. Univ. of Florida, Inst. of Food & Ag. Sci., Food & Res. Econ. Economic Information Report EI 00-2. 26 pp.
7. Haydu, J.J. and A.W. Hodges. 2001. Market Expansion Strategies for Turfgrass Producers in the Central United States. Univ. of Florida, Inst. of Food & Ag. Sci., Food & Res. Econ. Economic Information Report EI 01-04. 25 pp.
8. Haydu, J.J., A.W. Hodges, and L.N. Satterthwaite. 2003. Market Expansion Strategies for Turfgrass Producers in the Western United States. Univ. of Florida, Inst. of Food & Ag. Sci., Food & Res. Econ. Economic Information Report EI 00-3. 24 pp.
9. Haydu, J.J., R.C. Beeson, and J. Caron. 2004. Economic Analysis of Five Irrigation Technologies for Container-grown *Viburnum odoratissimum*. *Acta Hortic.* 664:309–316.
10. Henry, M.S. 1999. Landscaping quality and the price of single family houses: Further evidence from home sales in Greenville, South Carolina. *J. Environ. Hort.* 17:25–30.
11. MIG, Inc. 2004. *Implan 2001 50 State Data Package*. Stillwater, MN.
12. Miller, R.E. and P.D. Blair. 1985. *Input-output Analysis: Foundations and Extensions*. Prentice-Hall, Englewood Cliffs, NJ. 464 pp.
13. Orland, B., J. Vining, and A. Ebreo. 1992. The effect of street trees on perceived values of residential property. *Environment and Behavior* 24(3):298–325.
14. University of Florida. 2005. UF/IFAS sod producer survey, 2005. Unpublished data. Institute of Food & Agricultural Sciences, University of Florida, Gainesville, FL.
15. U.S. Department of Agriculture, National Agricultural Statistics Service. 2004. 2002 Census of Agriculture. United States Summary and State Data, Vol. 1, Geographic Area Series, Part 51, AC-02-A-51. United States Department of Agriculture, Washington, DC, June.
16. U.S. Department of Agriculture. 2005. Floriculture and nursery crops outlook. FLO-04. Available on-line at <http://usda.mannlib.cornell.edu/reports/erssor/specialty/flo-bb/flo04.pdf>.
17. U.S. Department of Commerce, U.S. Census Bureau. 2006. New residential construction, quarterly starts and completions by purpose and design. Web resource available at <http://www.census.gov/const/www/newresconsindex.html>, accessed Dec. 15, 2006.
